# Supplementary material for: Infectiousness of Asymptomatic Meriones shawi, Reservoir Host of Leishmania major
Source: MDPI journal article supplement (doi:10.3390/pathogens12040614), 2023-04-18
Supplement: s1 [file s1]

| Week<br>p.i. | Meriones<br>No. | Infective<br>dose | Symptoms on the<br>pinna | Xenodiagnosis<br>(positive females/ dissected<br>females) |
|--------------|-----------------|-------------------|--------------------------|-----------------------------------------------------------|
| 4            | 1               | 7,0E+03           | Asymptomatic             | 0/24                                                      |
| 4            | 2               | 7,0E+03           | Asymptomatic             | 0/19                                                      |
| 4            | 3               | 7,0E+03           | Asymptomatic             | 1/31                                                      |
| 5            | 7               | 7,0E+03           | Asymptomatic             | 0/20                                                      |
| 5            | 8               | 7,0E+03           | Asymptomatic             | 0/24                                                      |
| 5            | 9               | 7,0E+03           | Asymptomatic             | 0/33                                                      |
| 5            | 10              | 7,0E+03           | Asymptomatic             | 1/21                                                      |
| 5            | 11              | 7,0E+03           | Asymptomatic             | 0/19                                                      |
| 5            | 12              | 7,0E+03           | Asymptomatic             | 0/42                                                      |
| 5            | 13              | 14,0E+3           | Asymptomatic             | 0/17                                                      |
| 5            | 14              | 14,0E+3           | Asymptomatic             | 0/27                                                      |
| 5            | 15              | 14,0E+3           | Asymptomatic             | 0/14                                                      |
| 5            | 18              | 14,0E+3           | Asymptomatic             | 0/17                                                      |
| 5            | 19              | 14,0E+3           | Asymptomatic             | 0/19                                                      |
| 5            | 20              | 14,0E+3           | Asymptomatic             | 0/20                                                      |
| 5            | 23              | 14,0E+3           | Asymptomatic             | 0/16                                                      |
| 5            | 24              | 14,0E+3           | Asymptomatic             | 0/20                                                      |
| 5            | 25              | 14,0E+3           | Asymptomatic             | 0/18                                                      |
| 5            | 28              | 14,0E+3           | Asymptomatic             | 0/19                                                      |
| 5            | 29              | 14,0E+3           | Asymptomatic             | 0/20                                                      |
| 5            | 30              | 14,0E+3           | Asymptomatic             | 0/16                                                      |
| 8            | 1               | 7,0E+03           | Asymptomatic             | 1/27                                                      |
| 8            | 2               | 7,0E+03           | Asymptomatic             | 4/24                                                      |
| 8            | 3               | 7,0E+03           | Asymptomatic             | 1/15                                                      |
| 10           | 7               | 7,0E+03           | Asymptomatic             | 1/13                                                      |
| 10           | 8               | 7,0E+03           | Asymptomatic             | 0/10                                                      |
| 10           | 9               | 7,0E+03           | Asymptomatic             | 0/6                                                       |
| 10           | 10              | 7,0E+03           | Nodulus/swelling         | 0/18                                                      |
| 10           | 11              | 7,0E+03           | Asymptomatic             | 0/10                                                      |
| 10           | 12              | 7,0E+03           | Asymptomatic             | 0/20                                                      |
| 10           | 13              | 14,0E+3           | Asymptomatic             | 0/29                                                      |
| 10           | 14              | 14,0E+3           | Nodulus/swelling         | 2/10                                                      |
| 10           | 15              | 14,0E+3           | Asymptomatic             | 0/13                                                      |
| 10           | 16              | 14,0E+3           | Asymptomatic             | 0/22                                                      |
| 10           | 17              | 14,0E+3           | Asymptomatic             | 0/18                                                      |
| 10           | 18              | 14,0E+3           | Asymptomatic             | 0/21                                                      |
| 10           | 19              | 14,0E+3           | Asymptomatic             | 0/18                                                      |
| 10           | 20              | 14,0E+3           | Asymptomatic             | 1/17                                                      |
| 10           | 21              | 14,0E+3           | Asymptomatic             | 1/24                                                      |

|    |    |         |                   |      |
|----|----|---------|-------------------|------|
| 10 | 22 | 14,0E+3 | Asymptomatic      | 0/24 |
| 10 | 23 | 14,0E+3 | Asymptomatic      | 1/17 |
| 10 | 24 | 14,0E+3 | Asymptomatic      | 0/16 |
| 10 | 25 | 14,0E+3 | Asymptomatic      | 0/9  |
| 10 | 26 | 14,0E+3 | Asymptomatic      | 0/24 |
| 10 | 27 | 14,0E+3 | Asymptomatic      | 0/28 |
| 10 | 28 | 14,0E+3 | Nodulus/swelling  | 3/25 |
| 10 | 29 | 14,0E+3 | Asymptomatic      | 1/13 |
| 10 | 30 | 14,0E+3 | Asymptomatic      | 0/28 |
| 10 | 31 | 14,0E+3 | Ulcerative lesion | 0/21 |
| 10 | 32 | 14,0E+3 | Asymptomatic      | 2/24 |
| 12 | 1  | 7,0E+03 | Asymptomatic      | 0/20 |
| 12 | 2  | 7,0E+03 | Ulcerative lesion | 2/22 |
| 12 | 3  | 7,0E+03 | Ulcerative lesion | 2/24 |
| 15 | 7  | 7,0E+03 | Nodulus/swelling  | 0/13 |
| 15 | 8  | 7,0E+03 | Ulcerative lesion | 1/16 |
| 15 | 9  | 7,0E+03 | Ulcerative lesion | 0/23 |
| 15 | 10 | 7,0E+03 | Nodulus/swelling  | 0/10 |
| 15 | 11 | 7,0E+03 | Ulcerative lesion | 1/10 |
| 15 | 12 | 7,0E+03 | Ulcerative lesion | 2/32 |
| 16 | 2  | 7,0E+03 | Ulcerative lesion | 1/6  |
| 16 | 4  | 7,0E+03 | Ulcerative lesion | 1/6  |
| 20 | 7  | 7,0E+03 | Ulcerative lesion | 0/17 |
| 20 | 8  | 7,0E+03 | Ulcerative lesion | 0/23 |
| 20 | 9  | 7,0E+03 | Ulcerative lesion | 0/30 |
| 20 | 10 | 7,0E+03 | Nodulus/swelling  | 0/15 |
| 20 | 11 | 7,0E+03 | Ulcerative lesion | 0/29 |
| 20 | 13 | 14,0E+3 | Ulcerative lesion | 0/20 |
| 20 | 14 | 14,0E+3 | Ulcerative lesion | 1/7  |
| 20 | 16 | 14,0E+3 | Nodulus/swelling  | 0/12 |
| 20 | 17 | 14,0E+3 | Asymptomatic      | 0/18 |
| 20 | 18 | 14,0E+3 | Asymptomatic      | 2/17 |
| 20 | 19 | 14,0E+3 | Ulcerative lesion | 0/19 |
| 20 | 20 | 14,0E+3 | Nodulus/swelling  | 3/13 |
| 20 | 21 | 14,0E+3 | Ulcerative lesion | 0/14 |
| 20 | 24 | 14,0E+3 | Ulcerative lesion | 1/23 |
| 20 | 25 | 14,0E+3 | Ulcerative lesion | 0/22 |
| 20 | 26 | 14,0E+3 | Ulcerative lesion | 0/24 |
| 20 | 27 | 14,0E+3 | Ulcerative lesion | 0/14 |
| 20 | 28 | 14,0E+3 | Asymptomatic      | 1/31 |
| 20 | 29 | 14,0E+3 | Ulcerative lesion | 2/20 |
| 20 | 30 | 14,0E+3 | Ulcerative lesion | 4/22 |
| 20 | 31 | 14,0E+3 | Ulcerative lesion | 0/20 |

|    |    |         |                   |      |
|----|----|---------|-------------------|------|
| 20 | 32 | 14,0E+3 | Ulcerative lesion | 4/19 |
| 25 | 7  | 7,0E+03 | Ulcerative lesion | 1/25 |
| 25 | 8  | 7,0E+03 | Ulcerative lesion | 4/34 |
| 25 | 9  | 7,0E+03 | Ulcerative lesion | 0/36 |
| 25 | 10 | 7,0E+03 | Nodulus/swelling  | 1/33 |
| 25 | 11 | 7,0E+03 | Ulcerative lesion | 1/32 |
| 25 | 16 | 14,0E+3 | Ulcerative lesion | 1/3  |
| 25 | 20 | 14,0E+3 | Ulcerative lesion | 1/2  |
| 25 | 24 | 14,0E+3 | Ulcerative lesion | 1/3  |
| 25 | 30 | 14,0E+3 | Ulcerative lesion | 1/1  |
| 27 | 3  | 14,0E+3 | Asymptomatic      | 1/22 |
| 30 | 7  | 7,0E+03 | Ulcerative lesion | 0/28 |
| 30 | 11 | 7,0E+03 | Ulcerative lesion | 0/36 |
| 30 | 13 | 14,0E+3 | Ulcerative lesion | 0/12 |
| 30 | 14 | 14,0E+3 | Ulcerative lesion | 1/12 |
| 30 | 15 | 14,0E+3 | Ulcerative lesion | 0/14 |
| 30 | 16 | 14,0E+3 | Ulcerative lesion | 0/12 |
| 30 | 17 | 14,0E+3 | Nodulus/swelling  | 0/16 |
| 30 | 18 | 14,0E+3 | Ulcerative lesion | 2/12 |
| 30 | 19 | 14,0E+3 | Ulcerative lesion | 0/15 |
| 30 | 20 | 14,0E+3 | Ulcerative lesion | 0/12 |
| 30 | 24 | 14,0E+3 | Ulcerative lesion | 0/20 |
| 30 | 25 | 14,0E+3 | Ulcerative lesion | 0/21 |
| 30 | 26 | 14,0E+3 | Ulcerative lesion | 0/18 |
| 30 | 27 | 14,0E+3 | Ulcerative lesion | 0/20 |
| 30 | 28 | 14,0E+3 | Asymptomatic      | 1/20 |
| 30 | 29 | 14,0E+3 | Nodulus/swelling  | 1/21 |
| 30 | 30 | 14,0E+3 | Ulcerative lesion | 0/17 |
| 30 | 31 | 14,0E+3 | Nodulus/swelling  | 0/15 |
| 30 | 3  | 14,0E+3 | Asymptomatic      | 1/16 |
| 38 | 3  | 14,0E+3 | Asymptomatic      | 0/30 |

Table S1. Results of xenodiagnostic experiments performed with *Phlebotomus papatasi* on *Meriones shawi* infected with *Leishmania major*.
